# Supplementary material
Source: publisher figshare collection journal article supplement (https://karger.figshare.com/ndownloader/files/17382872)
Supplement: Supplementary file 1 [file 17382872]

## **Supplemental Material**

**Supplemental Figure 1. Patient Selection Diagram**

**Supplemental Table S1. Diagnosis and procedure codes defining vascular-access related services**

**Supplemental Table S2. Drugs included in ESRD Prospective Payment System (PPS) Consolidated Billing 2012-2014**

**Supplemental Table S3. Utilization of Selected Drugs in the ESRD PPS for arteriovenous fistula (AVF) and arteriovenous graft (AVG) placements 2012-2014**

**Supplemental Table S4. Catheter use for dialysis post-placement in patients with arteriovenous fistula (AVF) or arteriovenous graft (AVG) placements (2012-2014)**

**Supplemental Text 1. Comparison of results and methods to other published studies**

**Supplemental Table S5. Sensitivity Analysis comparing Current Study Definition of Access-Related Inpatient Admissions to the Thamer Method.**

**Supplemental Figure 1. Patient Selection Diagram**

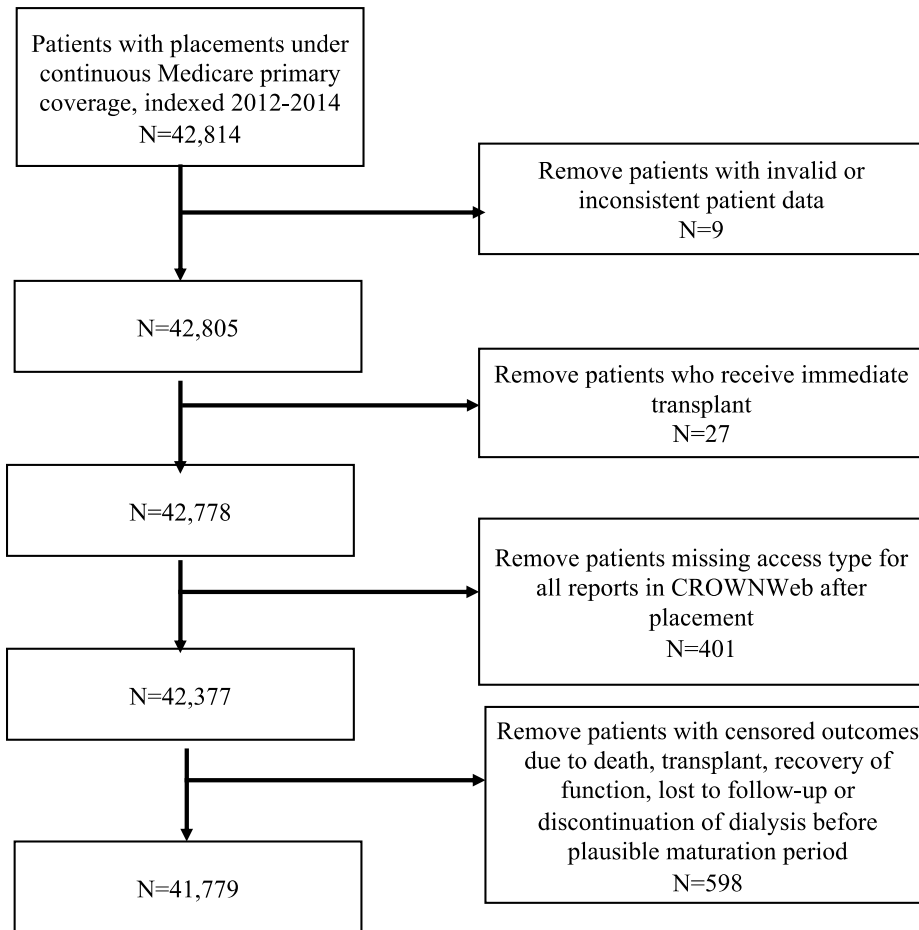

Source: USRDS Data release 2016

**Supplemental Table S1. Diagnosis and procedure codes defining vascular-access related services**

| Care Setting                                                    | Code Type             | Category                                                    | Codes                                                         |
|-----------------------------------------------------------------|-----------------------|-------------------------------------------------------------|---------------------------------------------------------------|
| Inpatient Admissions                                            | ICD-9 Diagnosis Codes | Catheter infection                                          | 999.31, 991.32, 999.33,                                       |
|                                                                 |                       | Device or vascular access infection                         | 996.6, 996.62, 996.1, 996.73, 996.74                          |
|                                                                 | ICD-9 Procedure Codes | Arteriovenostomy or revision/removal of arteriovenous shunt | 39.27, 39.42, 39.43                                           |
| Physician Services                                              | HCPCS Codes           | Access creation                                             | 36818, 36819, 36820, 36821, 36825, 36830                      |
|                                                                 |                       | Access revision                                             | 36832, 36833                                                  |
|                                                                 |                       | Catheter placement                                          | 36011, 36556, 36558, 36800, 36810, 76937                      |
|                                                                 |                       | Angioplasty                                                 | 35460, 35475, 35476, 75978, G0392, G0393                      |
|                                                                 |                       | Declotting                                                  | 36593, 36831, 36870, 37201                                    |
|                                                                 |                       | Revision                                                    | 35900, 35903, 36575, 36596, 36597, 36815, 36833, 36838, 37607 |
|                                                                 |                       | Stents                                                      | 37205, 37206, 37207, 37208, 37236, 37237, 37238, 37239, 75960 |
|                                                                 |                       | Catheter replacement                                        | 36581, 77001                                                  |
|                                                                 |                       | Other                                                       | G0365, 93990, 36147, 36148, 75791, 36589                      |
| Outpatient Visits*                                              | ICD-9 Diagnosis Codes | Catheter infection                                          | 999.31, 991.32, 999.33                                        |
|                                                                 |                       | Device or vascular access infection                         | 996.6, 996.62, 996.1, 996.73, 996.74                          |
| Other Settings (Hospice, Skilled Nursing Facility, Home Health) | ICD-9 Diagnosis Codes | Catheter infection                                          | 999.31, 991.32, 999.33                                        |
|                                                                 |                       | Device or vascular access infection                         | 996.6, 996.62, 996.1, 996.73, 996.74                          |

\*Outpatient claims are not definitively tied to a physician services claim. Therefore, a 5 day window around the physician services claim date was allowed when an outpatient facility claim could not be matched by diagnosis code or exact date.

**Supplemental Table S2. Drugs included in ESRD Prospective Payment System (PPS) Consolidated Billing 2012-2014<sup>a</sup>**

| ESRD PPS Drug Class | Sub-group reporting for       | HCPCS Code | Name                         | Years In PPS |
|---------------------|-------------------------------|------------|------------------------------|--------------|
| Access Management   | Plasminogen Activators (PAs)  | J2997      | Alteplase recombinant        | 2012-2014    |
|                     |                               | J2993      | Reteplase injection          |              |
|                     |                               | J3364      | Urokinase 5000IU injection   |              |
|                     |                               | J3365      | Urokinase 250000IU injection |              |
|                     | Other access management Drugs | J1642      | Inj heparin sodium per 10U   | 2012-2014    |
|                     |                               | J1644      | Inj heparin sodium per 1000U |              |
|                     |                               | J1945      | Lepirudin                    |              |
|                     |                               | C9121      | Injection argatroban         | 2014         |
| Anti-infectives     |                               | J0878      | Daptomycin                   | 2012-2014    |
|                     |                               | J3370      | Vancomycin HCL injection     |              |
| Anemia Management   | ESAs                          | J0882      | Darbepoetin                  | 2012-2014    |
|                     |                               | Q4081      | EPO                          | 2013-2014    |
|                     |                               | J0886      | EPO                          |              |
|                     | Other anemia management       | J1756      | Iron sucrose injection       | 2012-2014    |
|                     |                               | J2916      | NA Ferric gluconate complex  |              |
|                     |                               | J3420      | Vitamin B12 injection        |              |
|                     |                               | J0890      | Peginesatide                 |              |
|                     |                               | J1750      | Iron Dextran                 | 2013-2014    |
|                     |                               | Q0139      | Ferumoxytol                  |              |
|                     |                               | Q2047      | Peginesatide                 |              |

<sup>a</sup>[https://www.cms.gov/Medicare/Medicare-Fee-for-Service-Payment/ESRDpayment/Consolidated\\_Billing.html](https://www.cms.gov/Medicare/Medicare-Fee-for-Service-Payment/ESRDpayment/Consolidated_Billing.html)

Note: The Cellular Management class (levocarnitine only) is not included in this analysis. Two additional classes (Bone and Mineral Metabolism and Composite Rate Drugs and Biologicals) were introduced in 2013 and are not included in this analysis.

**Supplemental Table S3. Utilization of Selected Drugs in the ESRD PPS for arteriovenous fistula (AVF) and arteriovenous graft (AVG) placements 2012-2014**

|                   |                                                   | AVF (n=38,035) | AVG (n=12,789) | Sig.   |
|-------------------|---------------------------------------------------|----------------|----------------|--------|
| Access Management | Plasminogen Activators (PAs)                      |                |                |        |
|                   | Percent cohort ≥1 administration, 2012-2014 (N)   | 7.3% (2,782)   | 11.0% (1,411)  | <0.001 |
|                   | Mean administrations per dialysis-month (SD)      | 0.03 (0.37)    | 0.04 (0.27)    |        |
|                   | Median administrations per dialysis-month [Range] | 0 [0-32.4]     | 0 [0-10.1]     | <0.001 |
|                   | Other access management*                          |                |                |        |
|                   | Percent cohort ≥1 administration, 2012-2014 (N)   | 61.4% (23,333) | 60.7% (7,762)  | 0.190  |
|                   | Mean administrations per dialysis-month           | 0.39 (1.96)    | 0.38 (1.51)    |        |
|                   | Median administrations per dialysis-month [Range] | 0.08 [0-106]   | 0.09 [0-44]    | <0.001 |
| Anti-Infectives   | Daptomycin, Vancomycin†                           |                |                |        |
|                   | Percent cohort ≥1 administration, 2012-2014 (N)   | 35.7% (13,595) | 37.8% (4,837)  | <0.001 |
|                   | Mean administrations per dialysis-month           | 0.23 (0.64)    | 0.28 (0.76)    |        |
|                   | Median administrations per dialysis-month [Range] | 0 [0-12.3]     | 0 [0-12.3]     | <0.001 |
| Anemia Management | Erythropoiesis Stimulating Agents (ESAs)          |                |                |        |
|                   | Percent cohort ≥1 administration, 2012-2014 (N)   | 91.4% (34,778) | 88.6% (11,327) | <0.001 |
|                   | Mean administrations per dialysis-month           | 8.78 (6.42)    | 8.44 (6.39)    |        |
|                   | Median administrations per dialysis-month [Range] | 8.0 [0-45]     | 7.67 [0-45.9]  | <0.001 |
|                   | Other anemia management††                         |                |                |        |
|                   | Percent cohort ≥1 administration, 2012-2014 (N)   | 91.2% (34,683) | 85.8% (10,973) | <0.001 |
|                   | Mean administrations per dialysis-month           | 2.99 (1.83)    | 2.72 (1.90)    |        |
|                   | Median administrations per dialysis-month [Range] | 3.01 [0-19.1]  | 2.78 [0-14]    | <0.001 |

<sup>a</sup>Drug codes for each category are given in Supplemental Table S2.

\* Includes heparin, lepirudin (all years) and argatroban (2014 only)

†Daptomycin and vancomycin are the only bundled anti-infectives over the study period

† † Includes iron supplements and vitamin B12 (all years), ferumoxytol and peginesatide in 2013-2014

**Supplemental Table S4. Catheter use for dialysis post-placement in patients with arteriovenous fistula (AVF) or arteriovenous graft (AVG) placements (2012-2014).**

|                                                                     | <b>AVF</b>    | <b>AVG</b>    | <b>Sig.</b> |
|---------------------------------------------------------------------|---------------|---------------|-------------|
| Percent of cohort reporting catheter use $\geq 1$ month in CROWNWeb | 72.1%         | 23.3%         | <0.001      |
| Mean CROWNWeb monthly reports of CVC use per access life* (SD)      | 4.78 (3.65)   | 3.66 (3.89)   |             |
| Median CROWNWeb monthly reports of CVC use per access life* [Range] | 4.0 [0-32]    | 3.0 [0-32]    | <0.001      |
| Mean percent of access life on catheter** (SD)                      | 58.3% (36.8)  | 49.6% (38.7)  |             |
| Median percent of access life on catheter [Range]                   | 53.8% [0-100] | 36.4% [0-100] | <0.001      |

\* From placement to abandonment (for post-ESRD placement only).

\*\* CROWNWeb monthly report data represent a snapshot in time, and do not capture the entire inventory of placements used for HD in the month.

## **Supplemental Text 1. Comparison of results and methods to other published studies**

### *USRDS 2010 Annual Data Report [6]*

The methodology used in the 2010 ADR created patient cohorts identified by the access type (fistula, graft or catheter) in place during the last quarter of a calendar year with costs for each cohort accumulated over the following calendar year or until death, change in modality or transplant. This intent-to-treat approach may obscure the very dynamic nature of the actual vascular access type used in clinical practice. Moreover, by including period prevalent patients based on an access placed one quarter or more prior to the cost accumulation period, costs related to the placement and the early initiation phase were excluded.

ADR all-cause cost estimates are comparable to our findings: adjusting to a common 2017 dollars, the ADR estimated outpatient costs for all period prevalent HD patients to be \$2,473 per month and inpatient costs to be \$2,949 per month. However, despite similar code sets defining access-related events, the ADR access-related costs were only 6-12% of the total all-cause costs, while our estimates for an incident population are 21-30%. Much of this is likely due to our explicit capture of placement costs and the high-cost phase immediately after placement (see Figures 1-2). Furthermore, the ADR method for identifying access-related events underestimates costs in that only “pure” date and diagnosis/procedure code matches for inpatient, outpatient claims and physician/ supplier claims are included.

### *Thamer et al. Medicare Costs Associated With Arteriovenous Fistulas Among US Hemodialysis Patients [8]*

Using the USRDS, Thamer et al. also performed an intent-to-treat analysis of 10,135 AVF patients initiating hemodialysis over a one-year period from 2010-2011. Three patient cohorts were defined by access status at hemodialysis initiation – 1) patients initiating HD with a mature AVF; 2) patients initiating HD with a maturing AVF; and 3) patients initiating HD with a CVC, having an AVF placed within 9 months of initiation. Annualized cost outcomes for up to 2.5 years of follow-up were reported by cohort and clinical outcome (maintain primary patency, primary patency loss, secondary patency loss and AVF nonuse), making direct comparisons to our findings difficult.

Code sets for physician services were largely similar, with the largest differences in the definition of access related inpatient admissions. In the Thamer study, access related admissions were defined by a set of DRG codes combined with specific diagnosis codes, while our study required only an access-related infection code. As a sensitivity analysis, we implemented the Thamer method using our access cohort and found similar cost results (Supplemental Table S3).

**Supplemental Table S5. Sensitivity Analysis comparing Current Study Definition of Access-Related Inpatient Admissions to the Thamer Method.**

|                                                        | Access-Related Costs<br>Using Current Study Method <sup>1</sup> |                   | Access Related Costs<br>Using Thamer Method [8] |                   |
|--------------------------------------------------------|-----------------------------------------------------------------|-------------------|-------------------------------------------------|-------------------|
|                                                        | AVF<br>(n=38,035)                                               | AVG<br>(n=12,789) | AVF<br>(n=38,035)                               | AVG<br>(n=12,789) |
| Percent of cohort with ≥1 admission, 2012-2014 (N)     | 19.9% (7,582)                                                   | 27.7% (3,581)     | 21.8% (8,293)                                   | 27.5% (3,512)     |
| Mean number of admissions per dialysis-month (SD)      | 0.03 (0.11)                                                     | 0.06 (0.15)       | 0.04 (0.13)                                     | 0.07 (0.18)       |
| Median number of admissions per dialysis-month [Range] | 0 [0-3]                                                         | 0 [0-2]           | 0 [0-2.6]                                       | 0 [0-2]           |
| Mean length of stay in days (SD)                       | 1.9 (5.5)                                                       | 2.7 (6.2)         | 1.7 (4.6)                                       | 2.2 (5.7)         |
| Median length of stay [Range]                          | 0 [0-259]                                                       | 0 [0-159]         | 0 [0-210]                                       | 0 [0-303]         |
| Mean cost per dialysis-month <sup>2</sup> (SD)         | \$662 (2,500)                                                   | \$1,186 (3,820)   | \$698 (2,655)                                   | \$1,152 (3,764)   |

<sup>1</sup>Access-related utilization defined by ICD9 and HCPCS codes listed in Supplemental Table S1. Dialysis sessions are not considered access-related; all dialysis costs are reported in the all-cause outpatient category.

<sup>2</sup>Costs adjusted to 2017 USD.
